# Supplementary material for: Raspberry-like Pd3Pb alloy nanoparticles: superior electrocatalytic activity for ethylene glycol and glycerol oxidation
Source: Royal Society of Chemistry journal article supplement (doi:10.1039/d0ra00564a), 2020-01-01
Supplement: d0ra00564a1.pdf [file d0ra00564a1.pdf]

**Supplementary Information for**  
**Raspberry-like Pd<sub>3</sub>Pb alloy nanoparticles: Superior**  
**electrocatalytic activity for ethylene glycol and glycerol**  
**oxidation**

Yujie Duan<sup>a</sup>, Zhelin Liu<sup>a</sup>, Bo Zhao<sup>a,\*</sup>, Jinghai Liu<sup>b</sup>

*<sup>a</sup> School of Chemistry & Environmental Engineering, Changchun University of  
Science and Technology, Changchun, Jilin 130022, P.R. China*

*<sup>b</sup> Inner Mongolia Key Laboratory of Carbon Nanomaterials, College of Chemistry  
and Chemical Engineering, Nano Innovation Institute, Inner Mongolia University for  
Nationalities, Tongliao, Inner Mongolia 028000, China*

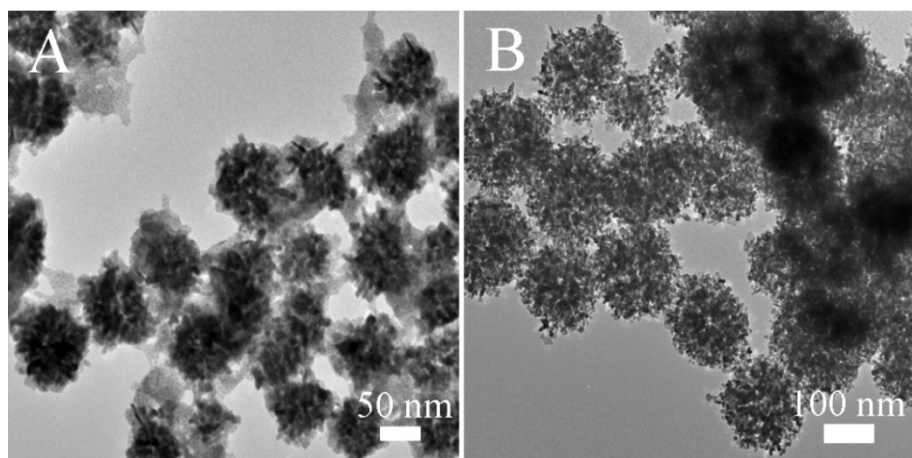

**Fig. S1** Typical TEM images of PdPb (A) and PdPb<sub>3</sub> (B) nanomaterials.

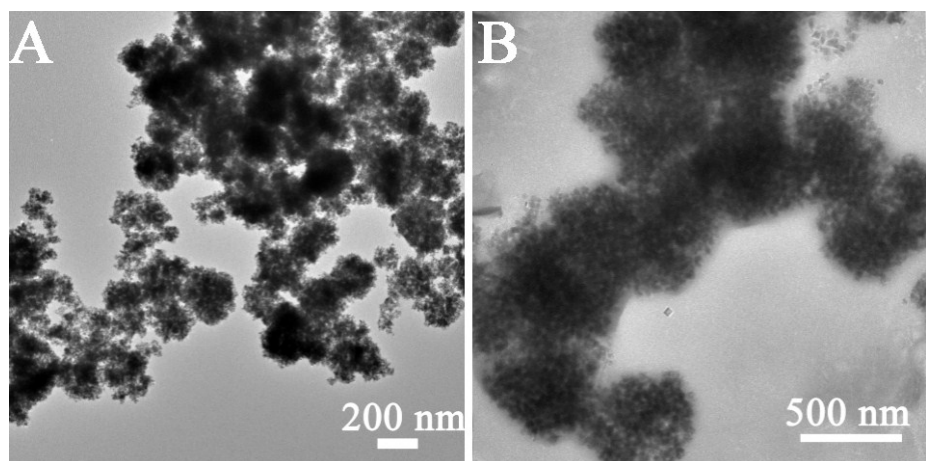

**Fig. S2** Typical TEM images of products prepared without CTAC (A) or citric acid (B).

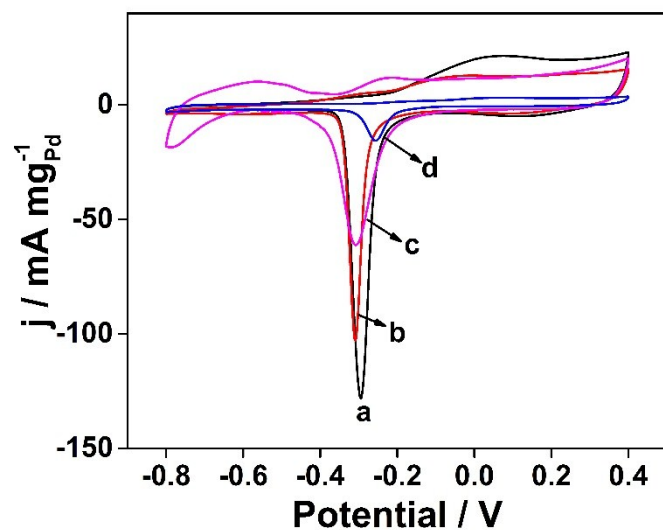

**Fig. S3** CV curves of Pd<sub>3</sub>Pb (a), PdPb (b), Pd (c) and PdPb<sub>3</sub> (d) modified GCEs in 1 M KOH at the scan rate of 50 mV s<sup>-1</sup>.

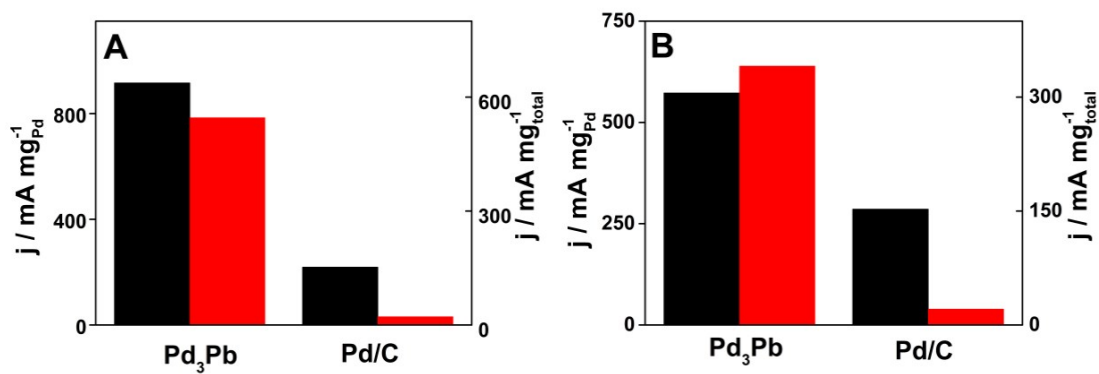

**Fig. S4** Histograms of activities per unit Pd mass (left) or total mass (right) on Pd<sub>3</sub>Pb alloy and commercial 10% Pd/C catalyst towards the electrooxidation of ethylene glycol (A) and glycerol (B).
